# Supplementary material for: The mineralization ability of a chloride-resistant γ-Cu2(OH)3Cl Fenton catalyst: effects of the cation type, salt concentration and organic pollutants
Source: Royal Society of Chemistry journal article supplement (doi:10.1039/d2nj04406d), 2022-01-01
Supplement: d2nj04406d1.pdf [file d2nj04406d1.pdf]

# The mineralization ability of chloride-resistant $\gamma$ - $\text{Cu}_2(\text{OH})_3\text{Cl}$ Fenton catalyst: effects of cation type, salt concentration and organic pollutants

Hao Wang<sup>1\*</sup>, Hongyou Yin<sup>1</sup>, Zeng Zhang<sup>1</sup>, Ying Xiong<sup>2</sup>, Yang Li<sup>3</sup>, Yan Wu<sup>1</sup>

1-School of Chemistry and Chemical Engineering, Southwest Petroleum University, Chengdu

610500, China

2-Research Institute of Natural Gas Technology, PetroChina Southwest Oil & Gas Field

Company, Chengdu 610500, China

3-Petrochemical Research Institute, PetroChina Co. Ltd, Beijing 102206, China

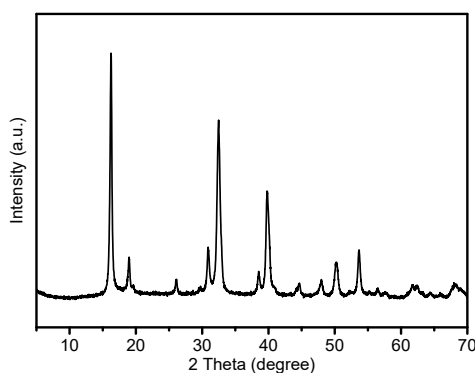

**Figure S1.** XRD pattern of  $\gamma$ - $\text{Cu}_2(\text{OH})_3\text{Cl}$  after soaking with  $15000 \text{ mg}\cdot\text{L}^{-1}$  NaCl solution.

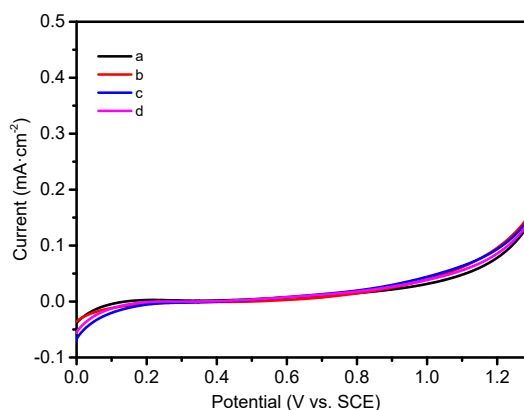

**Figure S2.** LSV curves in different systems, a: phenol+ $\gamma$ - $\text{Cu}_2(\text{OH})_3\text{Cl}$  +NaCl, b: phenol+ $\gamma$ - $\text{Cu}_2(\text{OH})_3\text{Cl}$  +KCl, c: phenol+ $\gamma$ - $\text{Cu}_2(\text{OH})_3\text{Cl}$  +MgCl<sub>2</sub>, d: phenol+ $\gamma$ - $\text{Cu}_2(\text{OH})_3\text{Cl}$  +CaCl<sub>2</sub>.

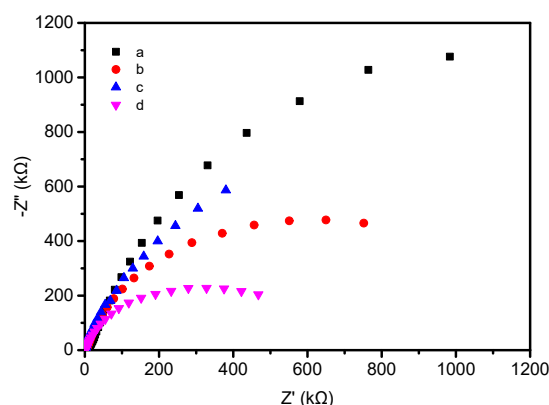

**Figure S3.** EIS diagrams of various systems, (a) phenol+ $\gamma$ - $\text{Cu}_2(\text{OH})_3\text{Cl}$ , (b) phenol+ $\gamma$ - $\text{Cu}_2(\text{OH})_3\text{Cl}+\text{H}_2\text{O}_2$ , (c) phenol+ $\gamma$ - $\text{Cu}_2(\text{OH})_3\text{Cl}+\text{NaCl}$ , and (d) phenol+ $\gamma$ - $\text{Cu}_2(\text{OH})_3\text{Cl}+\text{NaCl}+\text{H}_2\text{O}_2$ .

**Table S1** Binding energies of Cu  $2p_{3/2}$  and  $\text{Cu}^+$  percentage of catalysts.

| Samples                                                                                                                     | Binding energy (eV) |                  |                       |                       | Percentage of $\text{Cu}^+$ (%) |
|-----------------------------------------------------------------------------------------------------------------------------|---------------------|------------------|-----------------------|-----------------------|---------------------------------|
|                                                                                                                             | $\text{Cu}^+$       | $\text{Cu}^{2+}$ | $\text{Cu}^{2+}$ sat. | $\text{Cu}^{2+}$ sat. |                                 |
| $\gamma$ - $\text{Cu}_2(\text{OH})_3\text{Cl}$                                                                              | 934.1               | 935.5            | 942.3                 | 944.3                 | 34.0                            |
| $\gamma$ - $\text{Cu}_2(\text{OH})_3\text{Cl}+\text{H}_2\text{O}_2$<br>+3000 $\text{mg}\cdot\text{L}^{-1}$ NaCl             | 934.4               | 935.8            | 942.2                 | 944.2                 | 39.7                            |
| $\gamma$ - $\text{Cu}_2(\text{OH})_3\text{Cl}+\text{H}_2\text{O}_2$<br>+15000 $\text{mg}\cdot\text{L}^{-1}$ NaCl            | 934.2               | 935.5            | 942.1                 | 944.2                 | 39.8                            |
| $\gamma$ - $\text{Cu}_2(\text{OH})_3\text{Cl}+\text{H}_2\text{O}_2$<br>+15000 $\text{mg}\cdot\text{L}^{-1}$ KCl             | 934.1               | 935.5            | 942.2                 | 944.2                 | 39.8                            |
| $\gamma$ - $\text{Cu}_2(\text{OH})_3\text{Cl}+\text{H}_2\text{O}_2$<br>+15000 $\text{mg}\cdot\text{L}^{-1}$ $\text{MgCl}_2$ | 934.0               | 935.5            | 942.3                 | 944.3                 | 39.9                            |
| $\gamma$ - $\text{Cu}_2(\text{OH})_3\text{Cl}+\text{H}_2\text{O}_2$<br>+15000 $\text{mg}\cdot\text{L}^{-1}$ $\text{CaCl}_2$ | 934.1               | 935.7            | 942.3                 | 944.4                 | 39.9                            |

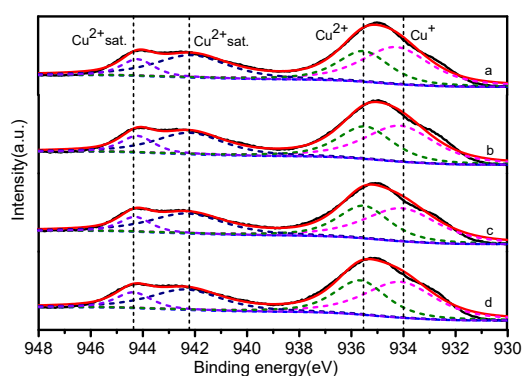

**Figure S4.** Cu  $2p_{3/2}$  XPS spectra of (a)  $\gamma$ - $\text{Cu}_2(\text{OH})_3\text{Cl}+\text{H}_2\text{O}_2+15000 \text{ mg}\cdot\text{L}^{-1}$  NaCl, (b)  $\gamma$ - $\text{Cu}_2(\text{OH})_3\text{Cl}+\text{H}_2\text{O}_2+15000 \text{ mg}\cdot\text{L}^{-1}$  KCl, (c)  $\gamma$ - $\text{Cu}_2(\text{OH})_3\text{Cl}+\text{H}_2\text{O}_2+15000 \text{ mg}\cdot\text{L}^{-1}$   $\text{MgCl}_2$ , (d)  $\gamma$ - $\text{Cu}_2(\text{OH})_3\text{Cl}+\text{H}_2\text{O}_2+15000 \text{ mg}\cdot\text{L}^{-1}$   $\text{CaCl}_2$ .

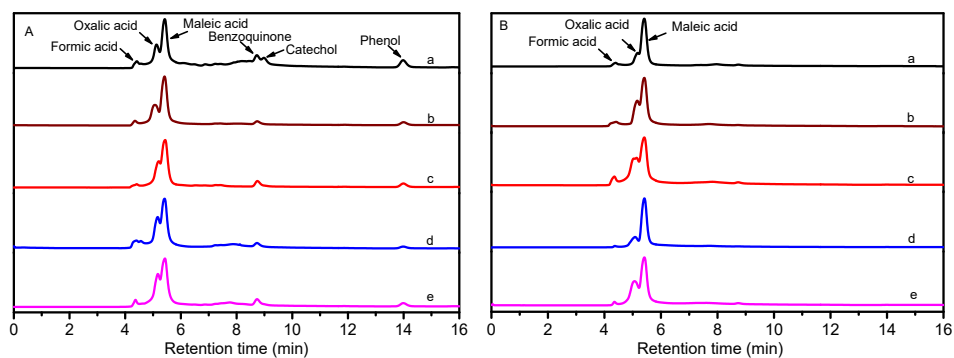

**Figure S5.** HPLC chromatograms of phenol mineralization at the reaction time of (A) 1 min and (B) 5 min in (a) saline-free and four saline solutions: (b) NaCl, (c) KCl, (d) MgCl<sub>2</sub> and (e) CaCl<sub>2</sub>. Reaction conditions: H<sub>2</sub>O<sub>2</sub> dosage 53 mmol·L<sup>-1</sup>, phenol concentration 100 mg·L<sup>-1</sup>, pH 6.4, 50 °C and catalyst dosage 0.4 g·L<sup>-1</sup>.

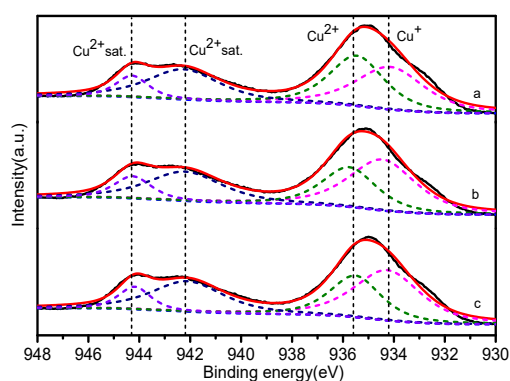

**Figure S6.** Cu 2p<sub>3/2</sub> XPS spectra of (a) fresh  $\gamma$ -Cu<sub>2</sub>(OH)<sub>3</sub>Cl, (b)  $\gamma$ -Cu<sub>2</sub>(OH)<sub>3</sub>Cl+H<sub>2</sub>O<sub>2</sub>+3000 mg·L<sup>-1</sup> NaCl, (c)  $\gamma$ -Cu<sub>2</sub>(OH)<sub>3</sub>Cl+H<sub>2</sub>O<sub>2</sub>+15000 mg·L<sup>-1</sup> NaCl.
